# Supplementary material
Source: PubMed Central journal article supplement (PMC8259666)
Supplement: ASN.2020040501SupplementaryData1.pdf [file ASN.2020040501SupplementaryData1.pdf]

# Crumbs2 is an essential slit diaphragm protein of the renal filtration barrier.

Annika Möller-Kerutt<sup>1</sup>, Juan E. Rodriguez-Gatica<sup>2</sup>, Karin Wacker<sup>1</sup>, Rohan Bhatia<sup>2</sup>, Jan-Peter Siebrasse<sup>2</sup>, Nanda Boon<sup>3</sup>, Veerle Van Marck<sup>5</sup>, Peter Boor<sup>6</sup>, Ulrich Kubitscheck<sup>2</sup>, Jan Wijnholds<sup>3,4</sup>, Hermann Pavenstädt<sup>1</sup> and Thomas Weide<sup>1\*</sup>

<sup>1</sup>) University Hospital of Muenster (UKM), Internal Medicine D (MedD), Albert-Schweitzer-Campus 1 Building A14, 48149 Muenster, Germany

<sup>2</sup>) Institute of Physical and Theoretical Chemistry; Biophysical Chemistry, Rheinische Friedrich-Wilhelms-University of Bonn, Wegeler Str. 12, 53115 Bonn, Germany

<sup>3</sup>) Department of Ophthalmology, Leiden University Medical Center (LUMC), Albinusdreef 2, 2333 ZA Leiden, The Netherlands

<sup>4</sup>) Netherlands Institute for Neuroscience, Royal Netherlands Academy of Arts and Sciences (KNAW), 1105 BA Amsterdam, The Netherlands

<sup>5</sup>) Gerhard-Domagk Institute of Pathology, University Hospital of Muenster (UKM), Muenster, Germany

<sup>6</sup>) Institute of Pathology, RWTH Aachen University Hospital, Aachen, Germany; Department of Nephrology and Immunology, RWTH Aachen University Hospital, Aachen, Germany

## Supplemental material

The supplemental material data consist of three supplemental tables (ST1-3), seven supplemental figures (SF1-7) and four supplemental video files (SV1-4).

## Supplemental material table of contents

This article contains the following supplemental material:

### Suppl. Tables

**Table ST1:** Primers for genotyping and cloning.

**Table ST2:** Antibodies used in this study.

**Table ST3:** Primer pairs for RT-PCR.

**Table ST4:** *Weight of observed wildtype (Cre-) and Crb2<sup>podKO</sup> (Cre+) mice.*

**Table ST5:** *Evaluation of glomerular injury in Crb2<sup>flox/flox</sup> (control) and Crb2<sup>podKO</sup> (knockout) mice.*

**Table ST6:** *Evaluation of tubular injury in wildtype Crb2<sup>flox/flox</sup> (Cre-) and Crb2<sup>podKO</sup> (Cre+) mice.*

**Table ST7:** *Localization of CRB2 variants in cells lines.*

### Suppl. Figures

**Figure S1:** *Improved spatial resolution by deconvolution.*

**Figure S2:** *Crb2 is highly expressed in mice glomeruli.*

**Figure S3:** *Non-Mendelian inheritance distribution of Six2-Cre-Crb2<sup>wt/flox</sup> x Crb2<sup>flox/flox</sup> breeding.*

**Figure S4:** *Analyses of one-week old Crb2<sup>podKO</sup> and littermate controls.*

**Figure S5:** *Crb2 loss results in glomerular sclerosis, accompanied by disordered and effaced foot processes (≥8-weeks-old-mice).*

**Figure S6:** *Doxycycline-dependent expression of GFP- or SNAP tagged CRB2.*

**Figure S7:** *RNAseq analyses of CRB2 S267A mutant.*

### Suppl. Videos

**Video SV1:** SV1\_Nephrin\_Podocin\_3D\_overview

**Video SV2:** SV1\_Nephrin\_Podocin\_3D\_zoom

**Video SV1:** SV3\_Crb2\_Nephrin\_3D\_overview

**Video SV1:** SV4\_Crb2\_Nephrin\_3D\_zoom

Supplemental Tables

Table ST1: Primers for cloning and genotyping.

| Cloning          |         |           |                                               |
|------------------|---------|-----------|-----------------------------------------------|
| Target           | Species | Direction | Sequence (5'-3')                              |
| hCrb2_wt         | human   | forward   | CACCGGGCGCGCCATGGCGCTGGCCAGGCCTGGGAC          |
| hCrb2_wt         | human   | reverse   | TTAATTAACTAGATGAGTCTCTCCTCCGGTGG              |
| hCrb2_S267A      | human   | forward   | GACGAGGACGAGTGTGCAGCCAGCCCCTGCCAGCATGGGGGCCGA |
| hCrb2_S267A      | human   | reverse   | TCGGCCCCCATGCTGGCAGGGGCTGGCTGCACACTCGTCCTCGTC |
| hCrb2_N800K      | human   | forward   | GGCGGCAGGCAGTCTCTGGAAGCTCACTGCGGGCTGCGTCTCC   |
| hCrb2_N800K      | human   | reverse   | GGAGACGCAGCCCGCAGTGAGCTTCCAGGACTGCCTGCCGCC    |
| hCrb2_C629S      | human   | forward   | ACTCATTCCGTTCTGACTGTGCC                       |
| hCrb2_C629S      | human   | reverse   | GGCACAGTCAGAACGGAATGAGT                       |
| hCrb2_R633W      | human   | forward   | TGCGACTGTGCCTGGCCCCATAGAGG                    |
| hCrb2_R633W      | human   | reverse   | CCTCTATGGGGCCAGGCACAGTCGCA                    |
| hCrb2_R1249Q     | human   | forward   | ATCCTGGCAGCCCAAAAGCGCCG                       |
| hCrb2_R1249Q     | human   | reverse   | CGGCGCTTTTGGGCTGCCAGGAT                       |
| hCrb2_R610W      | human   | forward   | AGAGCAGTGCTGGCCTCTGCCTTGTG                    |
| hCrb2_R610W      | human   | reverse   | CACAAGGCAGAGGCCAGCACTGCTCT                    |
| hCrb2_E792D      | human   | forward   | AGCCAGCCCAGCGACCTCGGCGGC                      |
| hCrb2_E792D      | human   | reverse   | GCCGCCGAGGTCGCTGGGCTGGCT                      |
| hCrb2_deltaintra | human   | forward   | CTGGCAGCCCGAAAGTGACGCCAGTCTGAGGGC             |
| hCrb2_deltaintra | human   | reverse   | GCCCTCAGACTGGCGTCACTTTCGGGCTGCCAG             |
| NPHS1            | human   | forward   | TTATGTCTCGAGATGGCCCTGGGGACGAC                 |
| NPHS1            | human   | reverse   | CTTGCTACCGGTAGCACCAGATGTCCCCTCAGCT            |
| Genotyping       |         |           |                                               |
| Target           | Species | Direction | Sequence (5'-3')                              |
| Crb2Fwd          | mouse   | forward   | TGGAGATGGACAGTGTCTCTC                         |
| Crb2Rev          | mouse   | reverse   | GCTCTGGAACAGTCTCCTTG                          |
| CreFwd           | mouse   | forward   | GACCAGGTTCTGTTCACTCA                          |
| CreRev           | mouse   | reverse   | TAGCGCCGTAAATCAA                              |

**Table ST2: Antibodies used in this study.**

| Protein / Antigen   | Species    | Manufacturer                                                                     | Clone, Cat.No    | Application               |
|---------------------|------------|----------------------------------------------------------------------------------|------------------|---------------------------|
| $\alpha$ -Actinin-4 | rabbit     | Enzo                                                                             | ALX-210-356      | WB (1:1000)               |
| $\beta$ -Tubulin    | mouse      | Sigma                                                                            | T4026            | WB (1:1000)               |
| BiP                 | rabbit     | Cell Signaling Technology                                                        | C50B12; #3177    | WB (1:1000)               |
| Calnexin            | mouse      | BD Biosciences                                                                   | Clone 37; 610523 | WB (1:1000)               |
| Crb2 (mouse)        | rabbit     | Jan Wijnholds Group<br>1) van de Pavert et al., 2004<br>2) Boroviak et al., 2011 |                  | WB (1:500),<br>IF (1:150) |
| CRB2 (human)        | rabbit     | Atlas Antibodies                                                                 | HPA043674        | IHC (1:300)<br>WB (1:500) |
| GFP                 | mouse      | TakaraBio Clontech                                                               | JL-8; 632381     | WB (1:1000)               |
| Nephrin             | guinea pig | Progen                                                                           | GP-N2            | WB (1:500)<br>IF (1:100)  |
| Nephrin             | mouse      | Santa Cruz                                                                       | sc-376522        | WB (1:500)                |
| Pals1/MPP5          | rabbit     | ProteinTech                                                                      | 17710-1-AP       | WB (1:1000)<br>IF (1:200) |
| Podocin             | rabbit     | Sigma                                                                            | P0372            | IF (1:200)                |

| Protein                             | Species                       | Manufacturer                     | Clone, Cat.No | Application                       |
|-------------------------------------|-------------------------------|----------------------------------|---------------|-----------------------------------|
| Anti-rabbit IgG Alexa488            | goat                          | Life technologies                | A11034        | IF (1:1000)                       |
| Anti-rabbit IgG Alexa594            | goat                          | Life technologies                | A11012        | IF (1:500)                        |
| Anti-rabbit IgG Alexa647            | goat                          | Life technologies                | A21244        | IF (1:500)                        |
| Anti-guinea pig IgG Alexa488        | goat                          | Life technologies                | A11073        | IF (1:500)                        |
| Anti-guinea pig IgG Alexa594        | goat                          | Life technologies                | A11076        | IF (1:500)                        |
| Anti-guinea pig IgG Alexa647        | goat                          | Life technologies                | A21450        | IF (1:500)                        |
| HRP-conjugated secondary antibodies | rabbit<br>mouse<br>guinea pig | Dianova; Jackson Immuno Research | -             | WB (1:3000)                       |
| SNAP-surface® AlexaFluor 488        | -                             | NEB                              | S9129S        | Live cell imaging (1:200, 30 min) |
| DAPI                                | -                             | Roche                            | -             | 1:5000                            |

## References

- 1) van de Pavert S, Kantardzhieva A, Malysheva A, Meuleman J, Versteeg I, Levelt C, Klooster J, Geiger S, Seeliger M, Rashbass P, Le Bivic A, Wijnholds J (2004) Crumbs homologue 1 is required for maintenance of photoreceptor cell polarization and adhesion during light exposure. J Cell Sci 117, 4169-4177
- 2) Boroviak T, Rashbass P. (2011) The apical polarity determinant Crumbs 2 is a novel regulator of ESC-derived neural progenitors. Stem Cells 29:193-205.

1 **Table ST3:** Primer pairs for RT-PCR.  
2

| Target                 | Species | Direction | Sequence (5'-3')          |
|------------------------|---------|-----------|---------------------------|
| <i>Gapdh</i>           | mouse   | forward   | CCTGGAGAAACCTGCCAAGTA     |
| <i>Gapdh</i>           | mouse   | reverse   | AAGTCGCAGGAGACAACCTG      |
| <i>Crb2</i>            | mouse   | forward   | TGTACCTGCCCTGCCAATTT      |
| <i>Crb2</i>            | mouse   | reverse   | ATGTCAGGCCTGTGTATCCATC    |
| <i>Crb3</i>            | mouse   | forward   | AACGGGGGCCTGTCTTCA        |
| <i>Crb3</i>            | mouse   | reverse   | CCCGAAGTTTTCGCATGAGC      |
| <i>Crb3A</i>           | mouse   | forward   | GCTCATGCGAAAACCTTCGGG     |
| <i>Crb3A</i>           | mouse   | reverse   | GGCAGCTTGAGGTTGGGG        |
| <i>Crb3B</i>           | mouse   | forward   | TCCTCCTTATAGCAGTGGGACT    |
| <i>Crb3B</i>           | mouse   | reverse   | CGTGGGAAAACCTGCTCCTCA     |
| <i>Nphs1</i>           | mouse   | forward   | TATCGCCAAGCCTTCACAGG      |
| <i>Nphs1</i>           | mouse   | reverse   | AGCTCAAAGGGCAGAGAACC      |
| <i>Nphs2</i>           | mouse   | forward   | CAGAGGAAGGCATCAAGCCC      |
| <i>Nphs2</i>           | mouse   | reverse   | GGACCTTTGGCTCTTCCAGG      |
| <i>Ccl2</i>            | mouse   | forward   | AGCTGTAGTTTTTGTACCAAGC    |
| <i>Ccl2</i>            | mouse   | reverse   | TGCTTGAGGTGGTTGTGGAA      |
| <i>Havcr1 (Kim1)</i>   | mouse   | forward   | GCATCTCTAAGCGTGGTTGC      |
| <i>Havcr1 (Kim1)</i>   | mouse   | reverse   | TGCAGCTGGAAGAACCAACA      |
| <i>Lcn2</i>            | mouse   | forward   | ACGGACTACAACCAGTTTCGC     |
| <i>Lcn2</i>            | mouse   | reverse   | AATGCATTGGTCGGTGGGG       |
| <i>Serpine1 (Pai1)</i> | mouse   | forward   | CACAGGCACTGCAAAAGGTC      |
| <i>Serpine1 (Pai1)</i> | mouse   | reverse   | GGATTGTCTCTGTCGGGTTGT     |
| <i>Tagln</i>           | mouse   | forward   | TTATGAAGAAAGCCCAGGAGCA    |
| <i>Tagln</i>           | mouse   | reverse   | TTTGTGAGGCAGGCTAAGCA      |
|                        |         |           |                           |
| Target                 | Species | Direction | Sequence (5'-3')          |
| <i>GAPDH</i>           | human   | forward   | GGACTCATGACCACAGTCCA      |
| <i>GAPDH</i>           | human   | reverse   | CCAGTAGAGGCAGGGATGATG     |
| <i>B3GALT5</i>         | human   | forward   | CCCCGCGCACGTGAT           |
| <i>B3GALT5</i>         | human   | reverse   | GCCAAGAGGAAATTTGTCTCAAAGA |
| <i>CANX</i>            | human   | forward   | GATGACTGGGATGAAGATGCC     |
| <i>CANX</i>            | human   | reverse   | CCTCAGGTTTCTCTGCGTCT      |
| <i>CRB2</i>            | human   | forward   | TGTACCTGCCCTGCCAATTT      |
| <i>CRB2</i>            | human   | reverse   | GCCACACACAAAAGCCATC       |
| <i>HSPA5</i>           | human   | forward   | CTCAACATGGATCTGTTCCGGT    |
| <i>HSPA5</i>           | human   | reverse   | ATTCGAGTCGAGCCACCAAC      |
| <i>HYOU1</i>           | human   | forward   | CGGGGAGTAGGATTTGACCG      |
| <i>HYOU1</i>           | human   | reverse   | CGGGGAGTAGGATTTGACCG      |

3  
4  
5  
6

**Table ST4: Weight of observed wildtype (Cre-) and *Crb2*<sup>podKO</sup> (Cre+) mice.**

The table show the weight of male and female mice used for experiments in this study at different time points. Differences of homozygote (HOM) wildtype (Cre-; *Crb2*<sup>flox/flox</sup>) and mice lacking *Crb2* in podocytes (Cre+; *Crb2*<sup>podKO</sup>) becomes significant after 8 weeks in male and female animals. Statistical evaluation was done by an unpaired two-tailed t-test for comparison of two groups. (n.s.: not significant; \* p<0.05)

| gender | age [weeks] | HOM Cre<br>(- /+) | weight [g]   | number of<br>animals | p-value       |
|--------|-------------|-------------------|--------------|----------------------|---------------|
| female | 1           | -                 | 5.00 ± 0.18  | N=4                  | 0.9567 (n.s.) |
| female | 1           | +                 | 4.98 ± 0.25  | N=4                  |               |
| male   | 1           | -                 | 4.93 ± 0.23  | N=4                  | 0.7369 (n.s.) |
| male   | 1           | +                 | 4.82 ± 0.17  | N=4                  |               |
| female | 5           | -                 | 16.06 ± 0.51 | N=10                 | 0.0527 (n.s.) |
| female | 5           | +                 | 14.97 ± 0.26 | N=13                 |               |
| male   | 5           | -                 | 17.61 ± 0.79 | N=6                  | 0.0897 (n.s.) |
| male   | 5           | +                 | 15.50 ± 0.80 | N=7                  |               |
| female | 8           | -                 | 20.91 ± 0.78 | N=5                  | 0.0446 (*)    |
| female | 8           | +                 | 17.78 ± 1.06 | N=5                  |               |
| male   | 8           | -                 | 23.66 ± 0.71 | N=7                  | 0.0189 (*)    |
| male   | 8           | +                 | 19.97 ± 0.95 | N=3                  |               |

**Table ST5: Evaluation of glomerular injury in *Crb2*<sup>flox/flox</sup> (control) and *Crb2*<sup>podKO</sup> (knockout) mice.**

To evaluate glomerular injury, the total amount of glomeruli without, or with segmental (<50%), or global (>50% of the glomerular area) increase in matrix were counted and categorized as “normal”, “segmental glomerular sclerosis” or “global glomerular sclerosis”, respectively. For that more than 70 glomeruli of wildtype control mice (*Crb2*<sup>flox/flox</sup>) and knockout mice that lack Crb2 in podocytes (*Crb2*<sup>podKO</sup>) were used (Figure 2 I). This table gives the values as mean injury score, summarizing segmental and global glomerular sclerosis as injury versus normal glomeruli. Values are given in [%] and statistical evaluation was done by an unpaired two-tailed t-test for comparison of two groups. (n.s.: not significant; \* p<0.05; \*\* p<0.01; \*\*\* p<0.001)

| age     | mean glomerular injury [%]                           |                                                   | p-value        |
|---------|------------------------------------------------------|---------------------------------------------------|----------------|
|         | <i>Crb2</i> <sup>flox/flox</sup> control<br>(number) | <i>Crb2</i> <sup>podKO</sup> knockout<br>(number) |                |
| 5 weeks | 3.35 ± 0.89 (N=4)                                    | 26.20 ± 1.54 (N=4)                                | < 0.0001 (***) |
| 8 weeks | 2.77 ± 0.66 (N=3)                                    | 61.37 ± 5.50 (N=3)                                | 0.0004 (***)   |

**Table ST6: Evaluation of tubular injury in wildtype *Crb2<sup>flox/flox</sup>* (Cre-) and *Crb2<sup>podKO</sup>* (Cre+) mice.**

Histopathological analysis: Acute tubular injury was estimated in the corticomedullary areas by determining the percentage of tubules with cast formation, dilatation, and degeneration (including epithelial cell necrosis and loss of apical brush border). For each of these parameters, a five-point scale according to *Marko et al* (JASN, 2016) was used: **0**: normal kidney; **1**: 1%–25%; **2**: 25%–50%; **3**: 50%–75%; **4**: 75%–100% tubular injury. The table gives the mean injury score for the different kind of tubular alterations (cast formation, dilatation of tubules and tubular degeneration). For each animal (N≥3) n≥5 visual fields were evaluated. Statistical evaluation was done by an unpaired two-tailed t-test for comparison of two groups. (n.s.: not significant; \* p<0.05; \*\* p<0.01)

| age     | type of tubular injury | mean injury score [%]                            |                                               | p-value       |
|---------|------------------------|--------------------------------------------------|-----------------------------------------------|---------------|
|         |                        | <i>Crb2<sup>flox/flox</sup></i> control (number) | <i>Crb2<sup>podKO</sup></i> knockout (number) |               |
| 5 weeks | cast                   | 0.04 ± 0.04 (N=3)                                | 0.07 ± 0.04 (N=4)                             | 0.6623 (n.s.) |
| 5 weeks | dilatation             | 0.16 ± 0.11 (N=3)                                | 0.92 ± 0.22 (N=4)                             | 0.0388 (*)    |
| 5 weeks | degeneration           | 0.04 ± 0.04 (N=3)                                | 0.46 ± 0.19 (N=4)                             | 0.1046 (n.s.) |
| 8 weeks | cast                   | 0.03 ± 0.03 (N=4)                                | 1.48 ± 0.44 (N=4)                             | 0.0165 (*)    |
| 8 weeks | dilatation             | 0.28 ± 0.15 (N=4)                                | 2.27 ± 0.48 (N=4)                             | 0.0076 (**)   |
| 8 weeks | degeneration           | 0.03 ± 0.03 (N=4)                                | 2.42 ± 0.74 (N=4)                             | 0.0180 (*)    |

**Table ST7: Localization of CRB2 variants in cells lines.**

The number of cells expressing CRB2-EGFP variants localized at the cell surface/plasma membrane or intracellularly, at the ER (*endoplasmic reticulum*) was determined for immortalized podocyte (AB8) and HEK293T cell lines. More than 200 cells per EGFP-CRB2 expressing variant were analyzed for stable AB8 based cell lines.

| CRB2 variant (mutant) | cell line | PM localization [%] | ER localization [%] | Disease-associated | remarks                                                   |
|-----------------------|-----------|---------------------|---------------------|--------------------|-----------------------------------------------------------|
| WT                    | AB8       | 96.0                | 4.0                 | no                 | (wildtype)                                                |
| S267A <sup>1)</sup>   | AB8       | 2.3                 | 97.7                | no                 | mutant according to (Ramkumar et al., 2015)               |
| R610W                 | AB8       | 94.0                | 6.0                 | no                 | evaluated as benigne                                      |
| C629S                 | AB8       | 3.4                 | 96.7                | yes                | Ebarasi et al., 20015                                     |
| R633W                 | AB8       | 7.5                 | 92.5                | yes                | Slavotinek et al., 2015                                   |
| E792D                 | AB8       | 94.8                | 5.2                 | no                 | evaluated as benigne                                      |
| N800K                 | AB8       | 14.0                | 86.0                | yes                | Slavotinek et al., 2015                                   |
| R1249Q <sup>2)</sup>  | AB8       | 10.7                | 89.3                | yes/unclear        | Ebarasi et al., 2015/<br>uncertain significance (ClinVar) |

<sup>1)</sup> mutant S267A inactivates putative conserved O-glycosylation for POGLUT by changing serin into alanine.

<sup>2)</sup> Homozygous CRB2 R1249Q variants have been linked to SRNS-like phenotype, FSGS9 (Ebarasi et al., 2015) and was interpreted as “pathogenic”. Two latter submissions observed no phenotype in homozygous humans and interpreted R1249Q homozygosity as “benign” (submission 2019, Dec, 31<sup>th</sup> by Invitae) or of “uncertain significance” (submission 2020, Jan, 6<sup>th</sup> by Reproductive Health Research and Development, BGI Genomics). Source: <https://www.ncbi.nlm.nih.gov/clinvar/variation/180703>

## Supplemental Figures

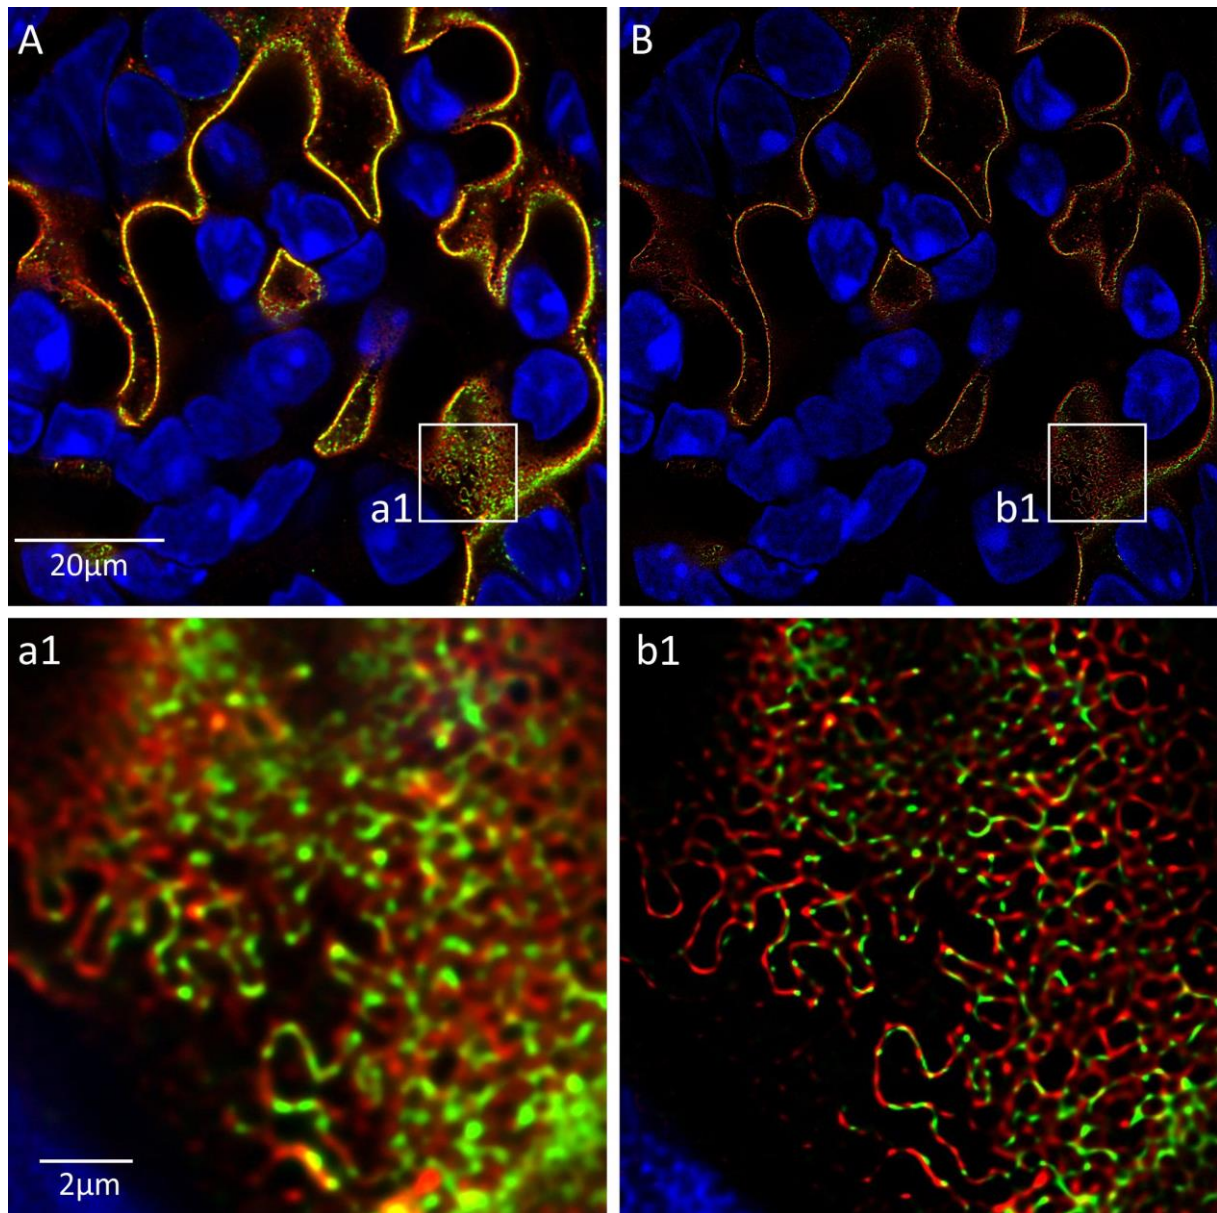

**Figure S1: Improved spatial resolution by deconvolution.**

**(A)** A single image of a glomerulus stained against Nephrin (green), Podocin (red) and DAPI (blue). The sample was imaged with a Leica SP8 using a 40x/1.1 water objective. Lateral size, 80.3. x 80.3 μm<sup>2</sup>. **(B)** Image after the deconvolution process **(a1-b1)** The magnifications demonstrate that an improved spatial resolution was obtained by the deconvolution process allowing the visualization of details that elucidated similar but slightly separated patterns of the Nephrin and Podocin signals. The same applied to the Crb2/Nephrin stained samples.

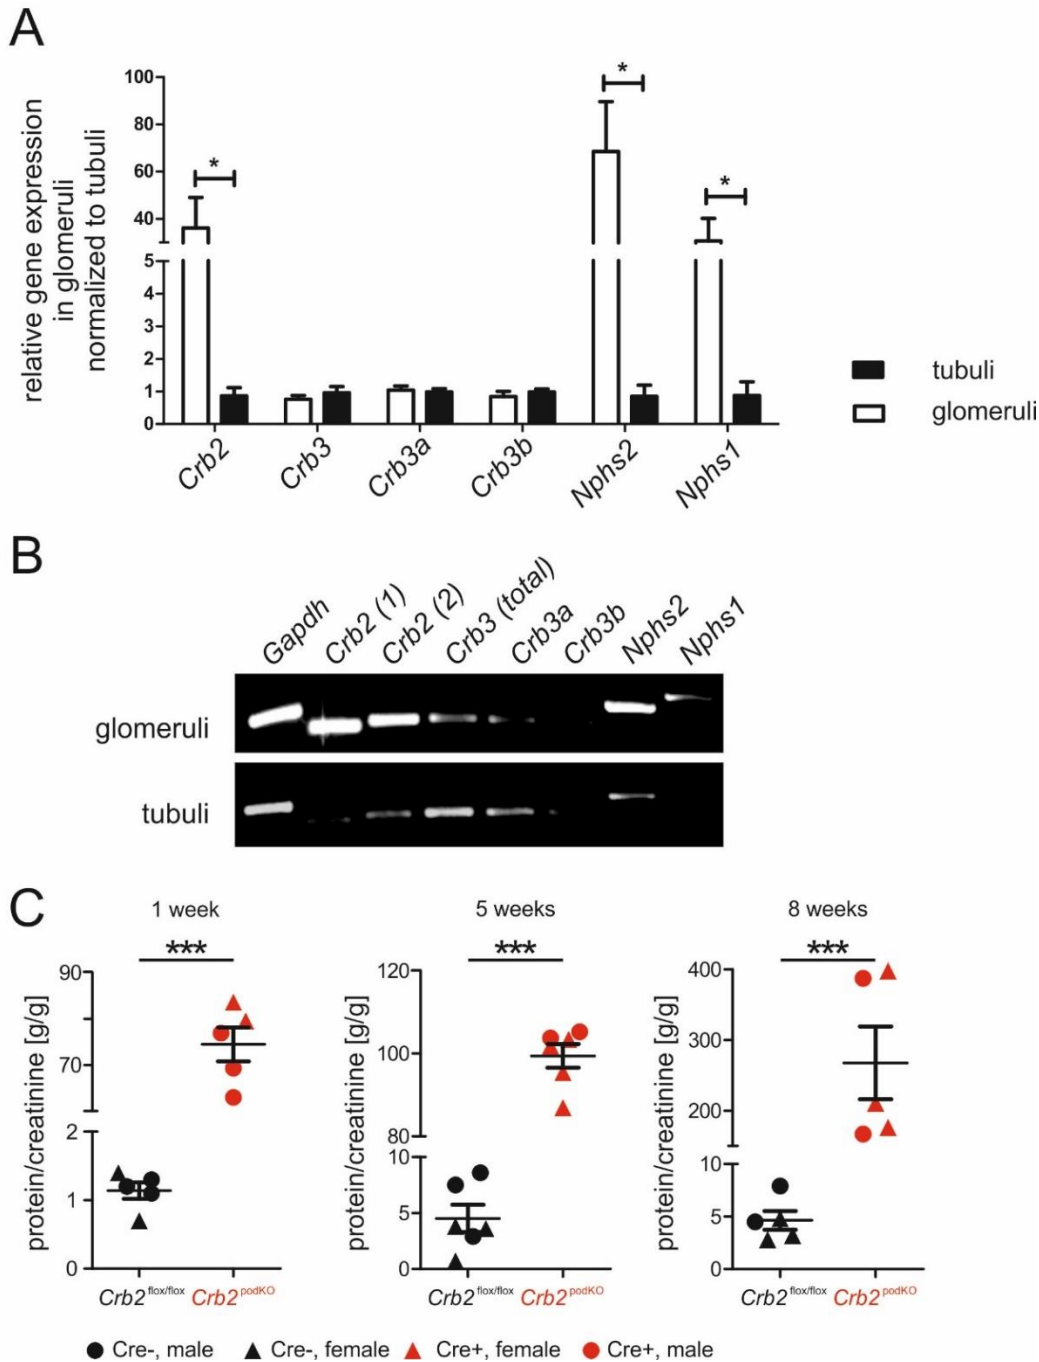

**Figure S2: *Crb2* is highly expressed in mice glomeruli.**

(A) Relative gene expression (qRT-PCR analysis) of *Crb2* in comparison to isoforms *Crb3a* and *Crb3b* and SD markers *Nphs1* (Nephrin) and *Nphs2* (Podocin) in murine glomeruli normalized to the tubular fraction. (B) Representative corresponding agarose gel of used primers pairs in RT-PCR experiments. (C) Quantification of proteinuria by determination of the protein creatinine ratio, indicating male circles and female (triangles) mice. (N=5, per group). Unpaired two-tailed t-Test: \*  $p < 0.05$ ; \*\*  $p < 0.01$ ; \*\*\*  $p < 0.001$

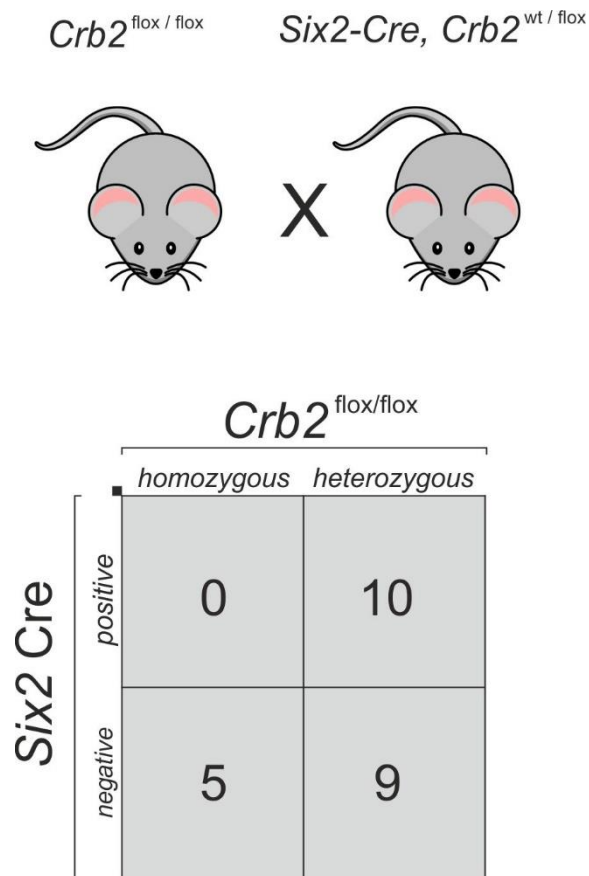

**Figure S3: Non-Mendelian inheritance distribution of  $Six2-Cre-Crb2^{wt/flox}$  x  $Crb2^{flox/flox}$  breeding.** Breeding of heterozygous  $Six2-Cre$  positive,  $Crb2^{wt/flox}$  with  $Crb2^{flox/flox}$  should result in the following Mendelian ratios: 25%  $Crb2^{wt/flox}$ ; 25%  $Crb2^{flox/flox}$  (both  $Six2\ Cre$ -negative); 25%  $Six2-Cre; Crb2^{wt/flox}$ ; 25%  $Six2-Cre; Crb2^{flox/flox}$  (both  $Six2-Cre$  positive). F1 mice that totally lack  $Crb2$  (homozygote  $Crb2^{flox/flox}$   $Six2-Cre$  positive;  $Crb2^{six2KO}$ ) offspring are missing, suggesting  $Crb2^{six2KO}$  result in embryonic lethality.

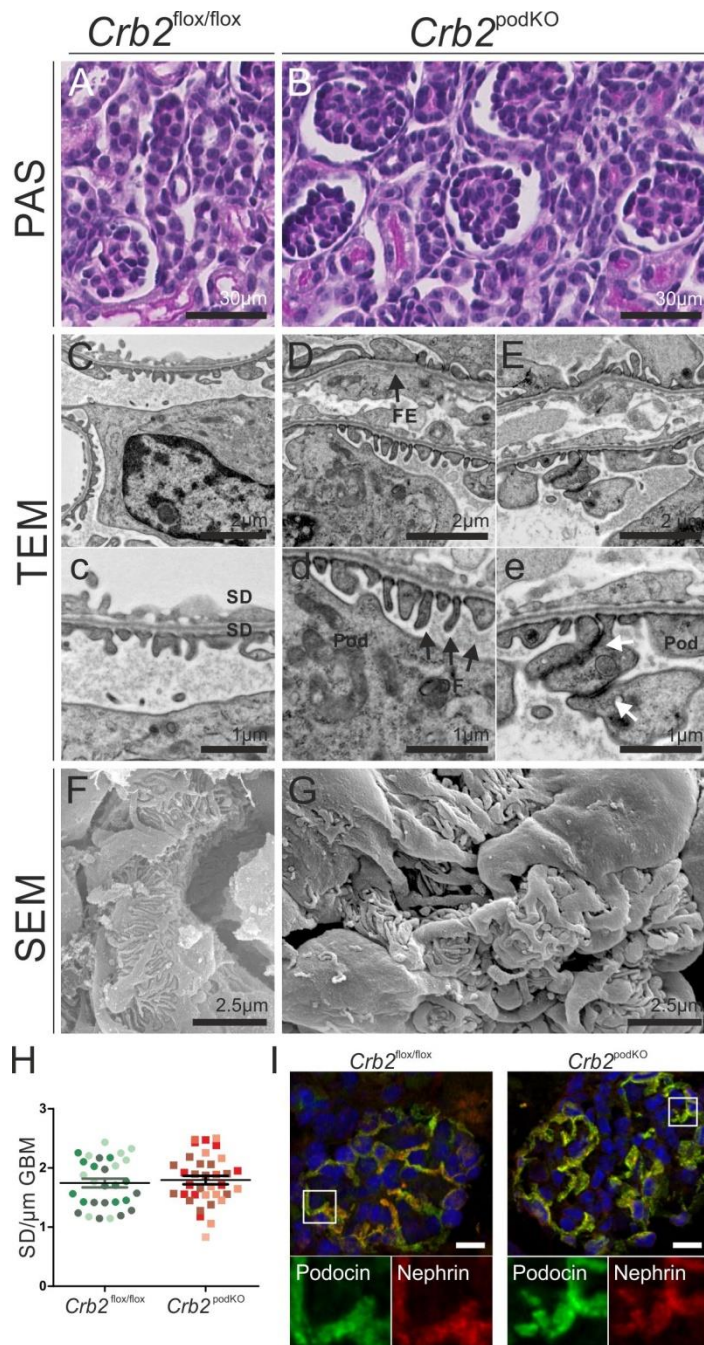

**Figure S4: Analyses of one-week old *Crb2*<sup>podKO</sup> and littermate controls.**

(A,B): PAS staining: Kidney tissue of one-week-old *Crb2*<sup>podKO</sup> showed no obvious difference between *Crb2*<sup>flox/flox</sup> and *Crb2*<sup>podKO</sup> mice. (C-E): TEM analyses: Ultrastructural analyses revealed some foot process effacement (FE, arrow) and processes of different sizes (D,d) in comparison to littermate control mice (C,c). In addition, podocytes of *Crb2*<sup>podKO</sup> showed electron-dense regions between the cells (E, e; white arrows). (F,G) SEM analyses of the wildtype (F) and *Crb2*<sup>podKO</sup> mice (G). **Pod**: podocyte cell body, **FE**: foot process effacement, **DF**: disordered foot process (H) Slit diaphragm (SD) number per μm GBM is not altered in 1-week old *Crb2*<sup>podKO</sup> animals (N=3, >250 μm GBM). (I) Illustrative immunofluorescence analyses of SD-proteins Nephrin (red) and Podocin (green) in glomeruli from *Crb2*<sup>flox/flox</sup> and *Crb2*<sup>podKO</sup> show similar staining pattern at this age.

1

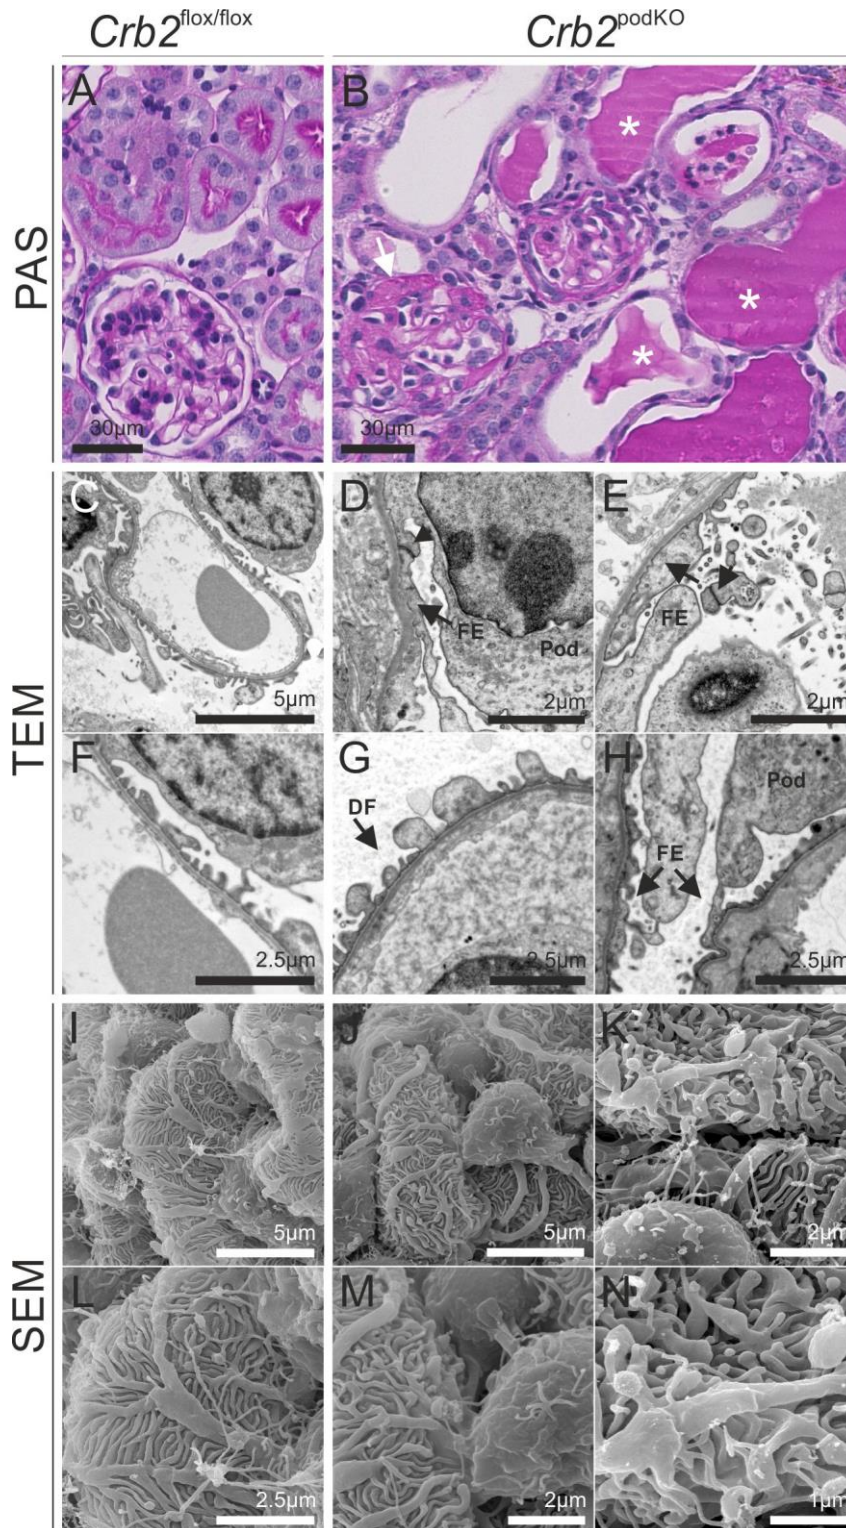

2

**Figure S5: *Crb2* loss results in glomerular sclerosis, accompanied by disordered and effaced foot processes (≥8-weeks-old mice).**

**(A,B):** PAS staining: The wildtype mice showed typical tubular and glomerular structures. Glomeruli of *Crb2*<sup>podKO</sup> showed segmental sclerosis (white arrow). Renal tubuli were dilated and contained protein casts (white asterisks) **(C-H):** TEM analyses: Ultrastructural analyses revealed increased foot process effacement (FE arrow) and processes of different size (G,H) in comparison to littermate controls (C,F). **(I-N)** SEM analyses: By contrast to the wildtype (I,L) podocytes foot processes of *Crb2*<sup>podKO</sup> mice were disordered, of variable size (J,K) and developed rounded ends (M,N).

**Pod:** podocyte cell body, **FE:** foot process effacement, **DF:** disordered foot process

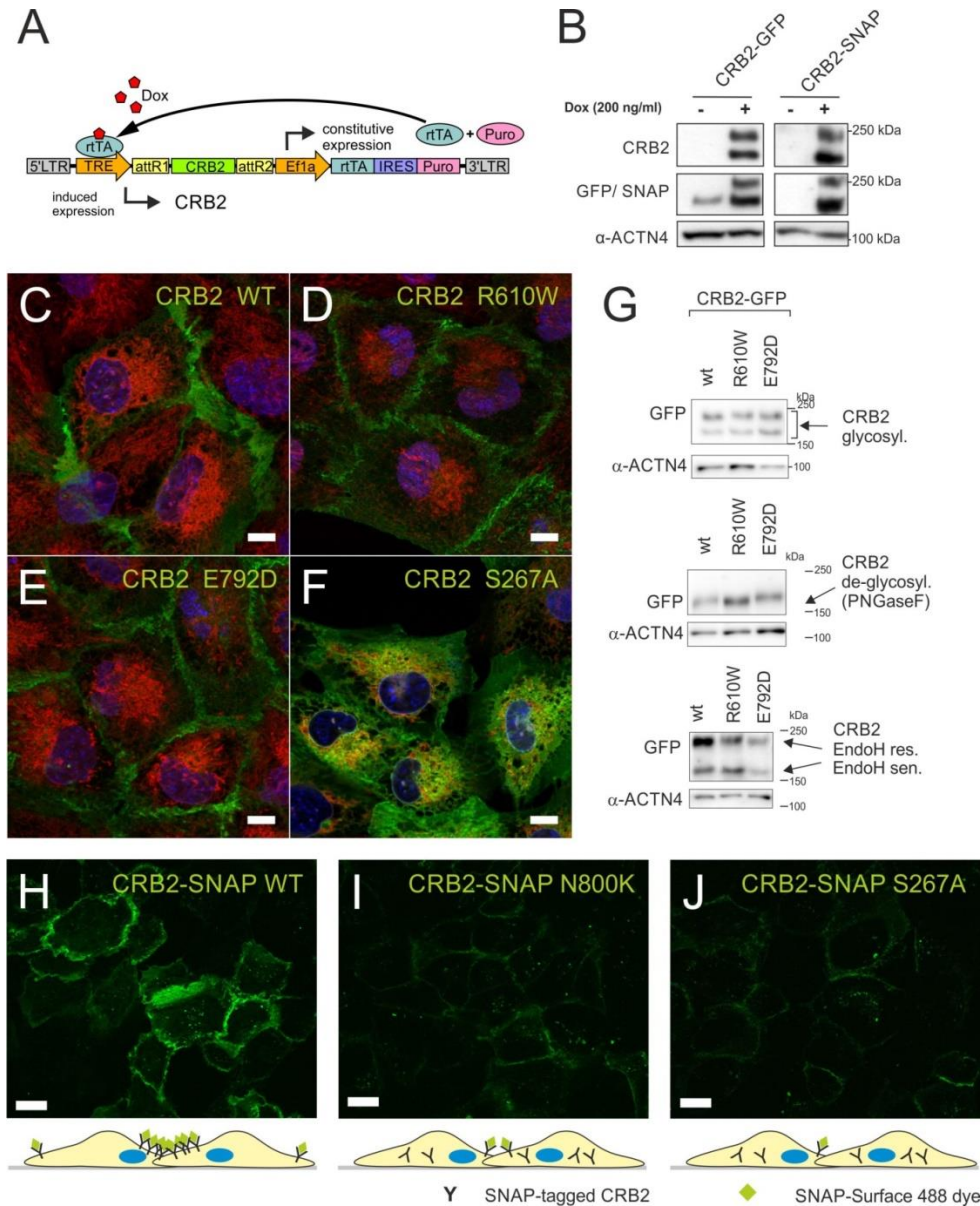

**Figure S6: Doxycycline-dependent expression of GFP- or SNAP tagged CRB2.**

(A) Scheme: The lentiviral pINDUCER21\_Puro system was used to express various CRB2 wildtype as well as CRB2 mutants and variants under the control of doxycycline (Dox). (B) Western blot: Stable AB8 podocyte cell lines express GFP- or SNAP tagged CRB2 only after administration of Dox (200ng/ml). Expression was validated with antibodies against CRB2 or against the used GFP and SNAP tags, respectively. AB8 cells have no endogenous CRB2 expression. (C-F) We added two non-pathogenic CRB2 variants (R610W and E792D) to our studies. CRB2 R610W and E792D variants showed a clear localization in overlapping regions, similar as the used CRB2 wildtype (The CRB2 S267A mutant served was included to show non-surface localization). (G) R610W and E792D showed same glycosylation pattern in glycosylation analyses as the used CRB2 wildtype. (H-J) Surface labeling assays of SNAP-tagged Crb2 wildtype and N800K and S267A mutants in combination with the cell membrane impermeable SNAP-Surface<sup>®</sup> 488 dye. Only SNAP-tags on the surface of cells are able to bind the surface labeling dye. Compared to the WT protein (H) N800K (I) and S267A (J) Using identical exposure times, Crb2 mutants strongly showed a strongly reduced surface labeling in comparison to strongly positive CRB2 wildtype. Scale bar= 10 μm.

A

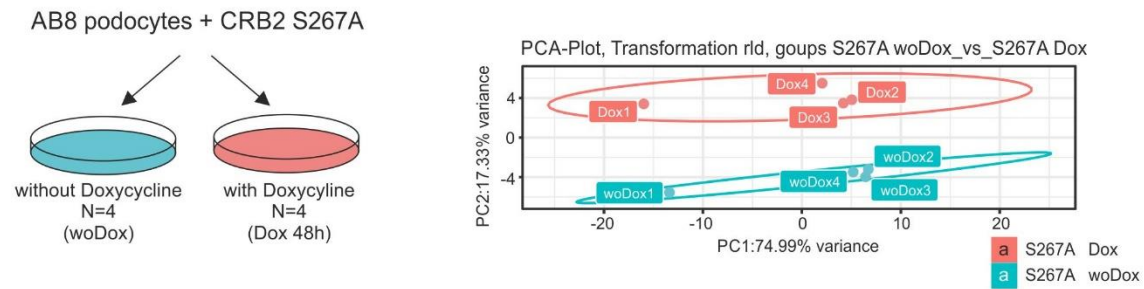

B

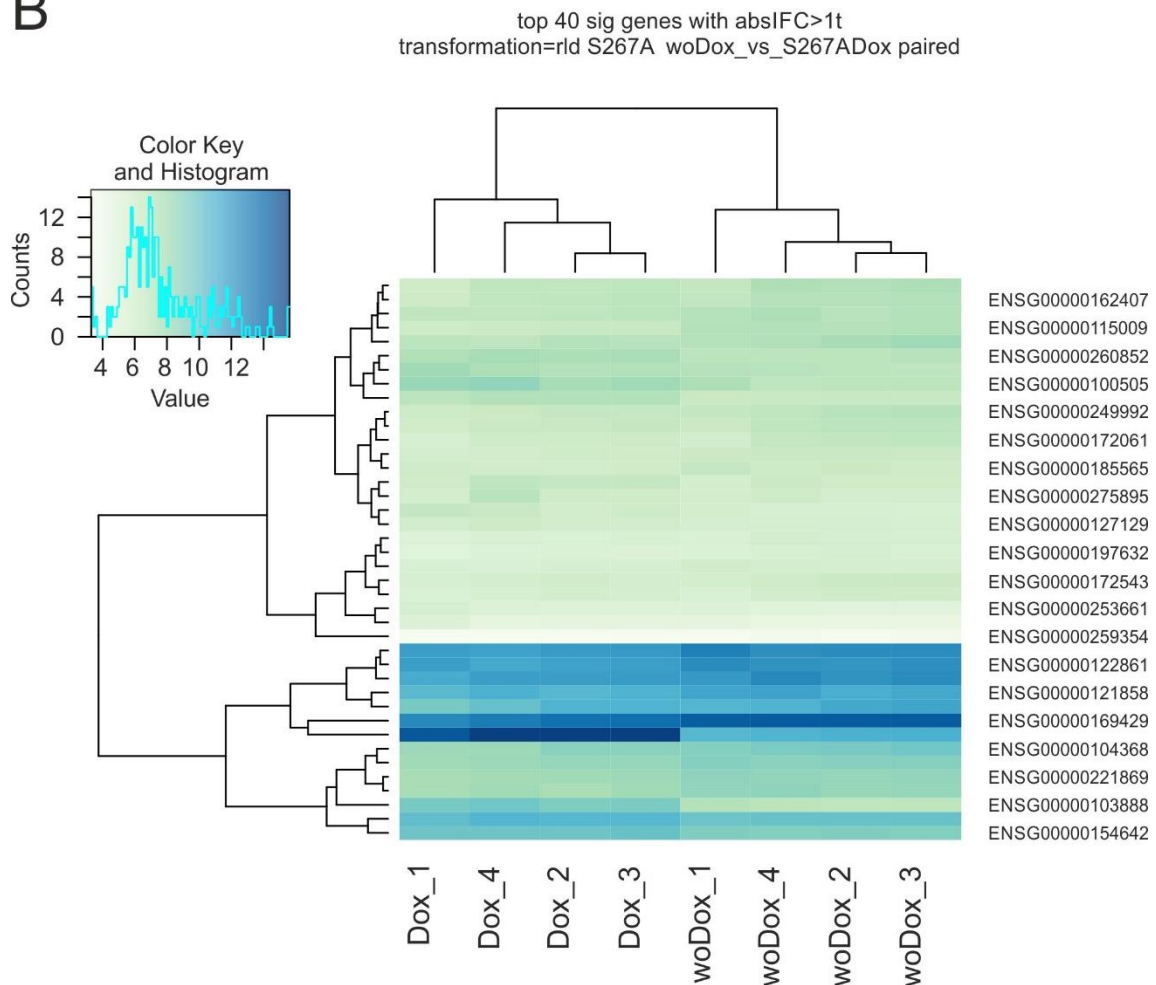

1

2 **Figure S7: RNAseq analysis of CRB2 S267A mutant.**

3 **(A) left:** Setup of RNAseq analyses of AB8 podocyte cells expressing the GFP-tagged S267A Crb2 mutant  
 4 (with Doxycycline, Dox) compared to non-induced control (woDox); **right** PCA-Plot transformation of  
 5 the used samples of AB8 cells without (woDox) and with doxycycline induced (Dox) overexpression of  
 6 Crb2-GFP S267A (N=4). **(B)** Heatmap of rlog-transformed values across samples of the top 40 significant  
 7 regulated genes emphasizes the clear separation of four induced (Dox) and four non-induced (woDox)  
 8 samples.

9

## 1 Supplemental Videos

### 2 **Video SV1:** *SV1\_Nephrin-Podocin\_3D\_overview\_720\_20\_fps*

3 3D stack of an expanded glomerulus stained against Nephrin (green), Podocin (red) and DAPI (blue).  
4 Sample imaged with a Leica SP8. Size 80.3. x 80.3 x 16.9  $\mu\text{m}^3$  (63 slices, 40x/1.1 NA water objective). The  
5 sample is shown after deconvolution with Huygens using the CLME algorithm, SNR: 40. The video  
6 highlights the Nephrin/Podocin structures first in a 3D rendering done with Imaris software and shows  
7 later the nuclei stained with DAPI to give a better representation of the spatial distribution.

8

### 9 **Video SV2:** *SV1\_Nephrin-Podocin\_3D\_zoom\_720\_20\_fps*

10 3D segmentation of a region of an expanded glomerulus showed in the supplementary video **SV1**,  
11 visualizing that the intracellular adapter Podocin (red) localizes more closely to the nuclei (blue) than  
12 the transmembrane protein Nephrin (green). Segmentation was performed in Imaris using the Surface  
13 tool, independently on each channel, considering a bounding box of 23. x 19.6 x 10  $\mu\text{m}^3$

14

### 15 **Video SV1:** *SV3\_Crb2-Nephrin\_3D\_overview\_720\_20\_fps*

16 3D stack of an expanded glomerulus stained against Crb2 (green), Nephrin (red) and DAPI (blue). The  
17 sample was imaged with a Leica SP8. Size 90.7. x 90.7 x 24.1  $\mu\text{m}^3$  (105 slices, 40x/1.1 NA water objective).  
18 The sample is shown after deconvolution with Huygens using the CLME algorithm, SNR: 40. The video  
19 highlights the Crb2/Nephrin structures first in a 3D rendering done with Imaris and showing later the  
20 nuclei stained with DAPI to give a better representation of the spatial distribution.

21

### 22 **Video SV1:** *SV4\_Crb2-Nephrin\_3D\_zoom\_720\_20\_fps.*

23 3D segmentation of a region of an expanded glomerulus showed in the supplementary video **SV2**,  
24 revealing the presence of adjacent Crb2 (green) and Nephrin (red) clusters, in contrast to the  
25 Nephrin/Podocin localization. Segmentation was performed in Imaris using the Surface tool,  
26 independently on each channel, considering a bounding box of 23. x 19.6 x 10  $\mu\text{m}^3$

27
